# Supplementary material for: A highly efficient and stable perovskite cathode with in situ exsolved NiFe alloy nanoparticles for CO2 electrolysis
Source: Royal Society of Chemistry journal article supplement (doi:10.1039/d2se00225f), 2022-01-01
Supplement: d2se00225f1.pdf [file d2se00225f1.pdf]

## Supplementary information

### **Highly efficient and stable perovskite cathode with *in-situ* exsolved NiFe alloy nanoparticles for CO<sub>2</sub> electrolysis**

Mengmeng Wang, Naizhi Li, Qing shen, Zhongliang Zhan\*, Chusheng Chen\*\*

CAS Key Laboratory of Materials for Energy Conversion, Collaborative Innovation  
Center of Chemistry for Energy Materials, and Department of Materials Science and  
Engineering, University of Science and Technology of China, Hefei, Anhui 230026, P.  
R. China

\* Corresponding author.

\*\* Corresponding author.

E-mail addresses: ccs@ustc.edu.cn (C. Chen), zzhan@ustc.edu.cn (Z. Zhan).

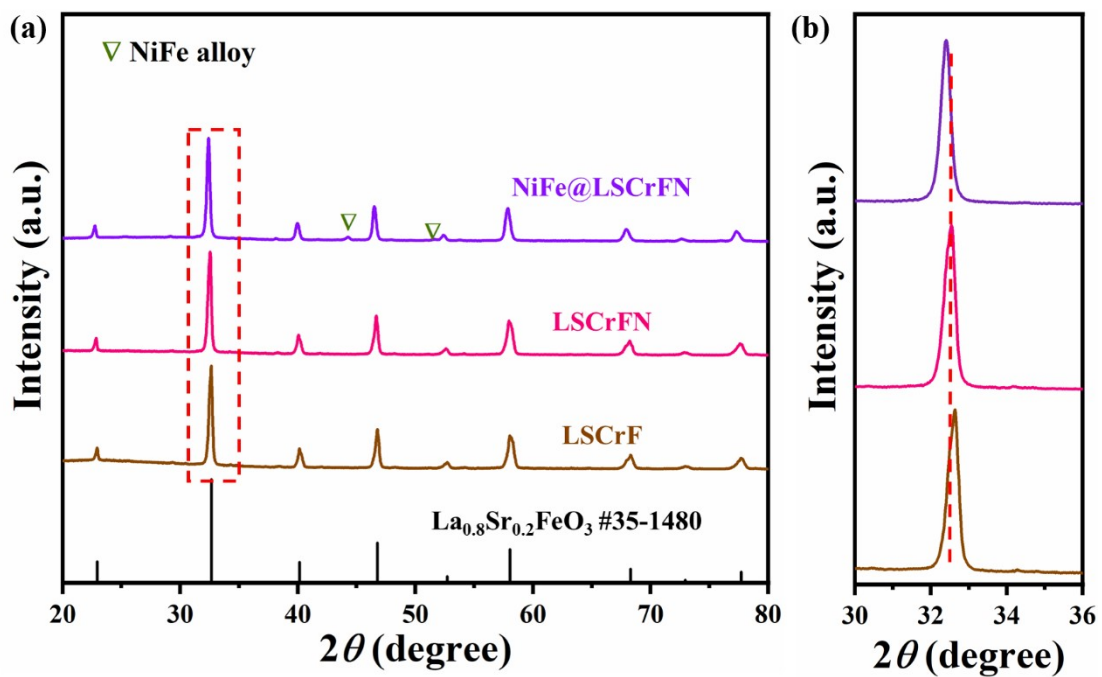

**Fig. S1** (a) XRD patterns of LSCrF, LSCrFN and NiFe@LSCrFN. (b) Enlarged XRD patterns at 30-36° of (a).

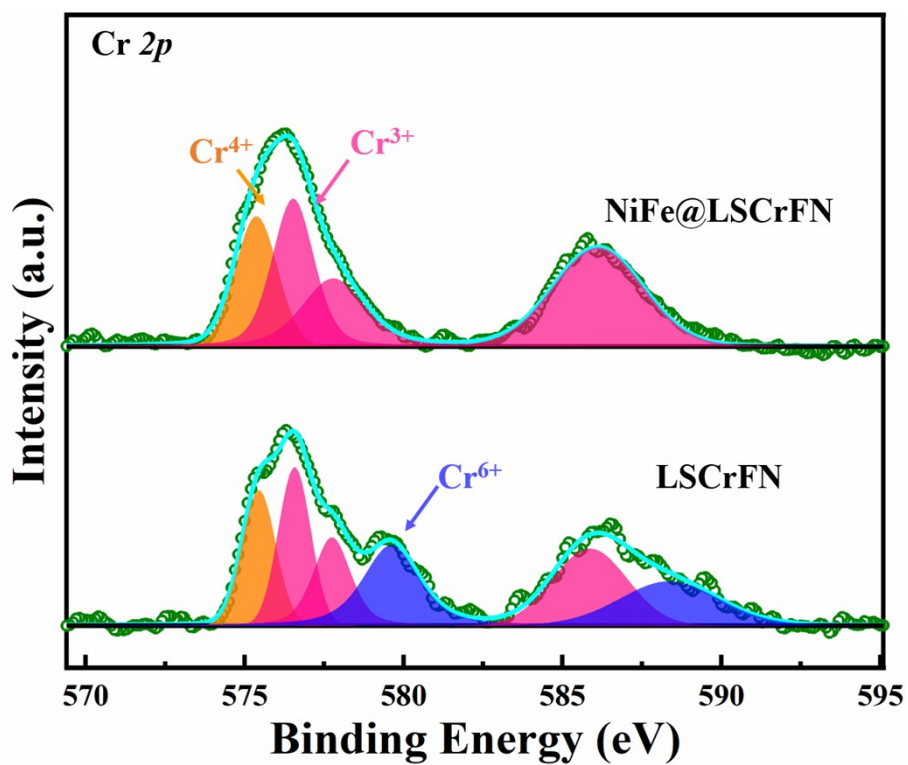

**Fig. S2** XPS spectra of Cr 2p for LSCrFN and NiFe@LSCrFN.

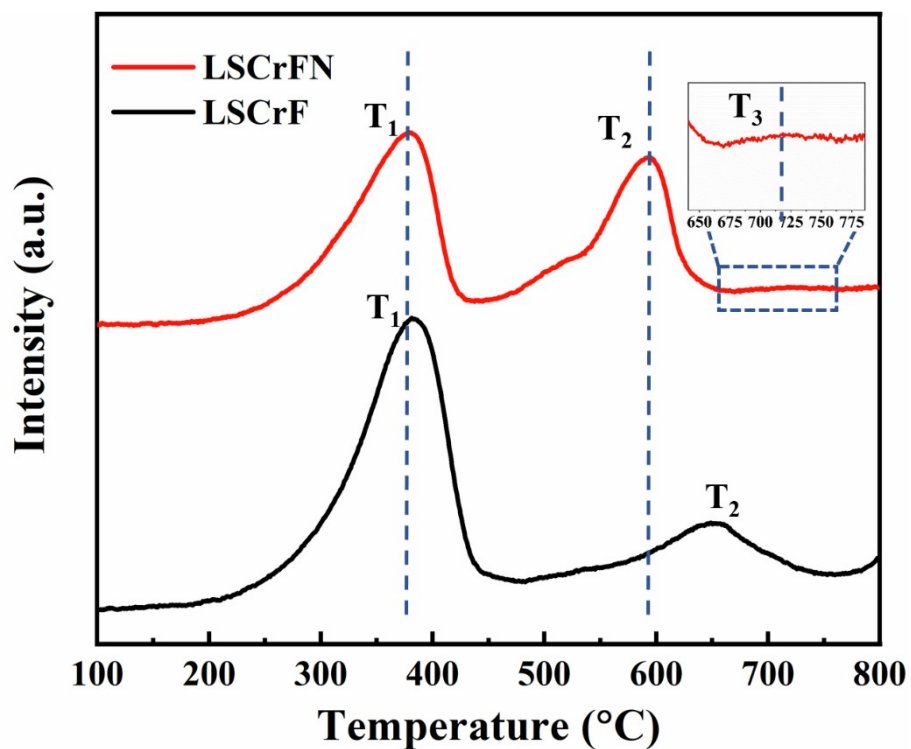

Fig. S3 TPR profiles in hydrogen for LSCrFN and LSCrF sample.

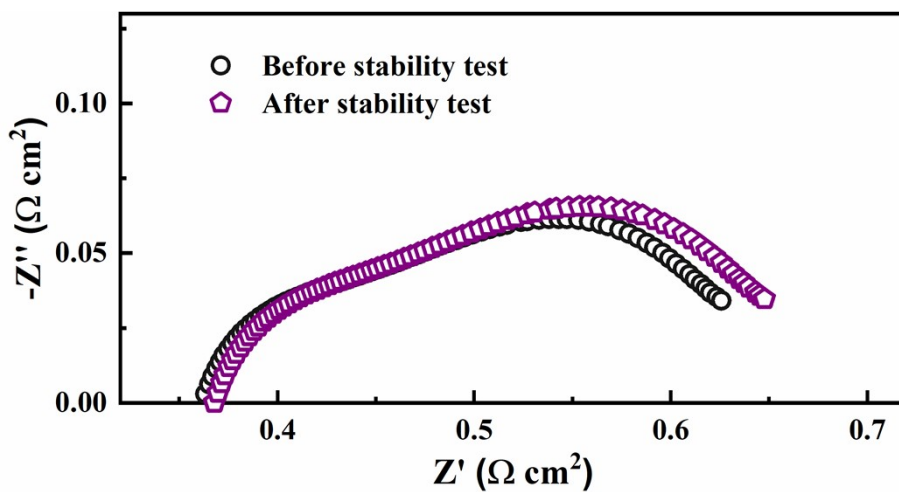

Fig. S4 The impedance spectra of Cell-2 before and after the stability test.

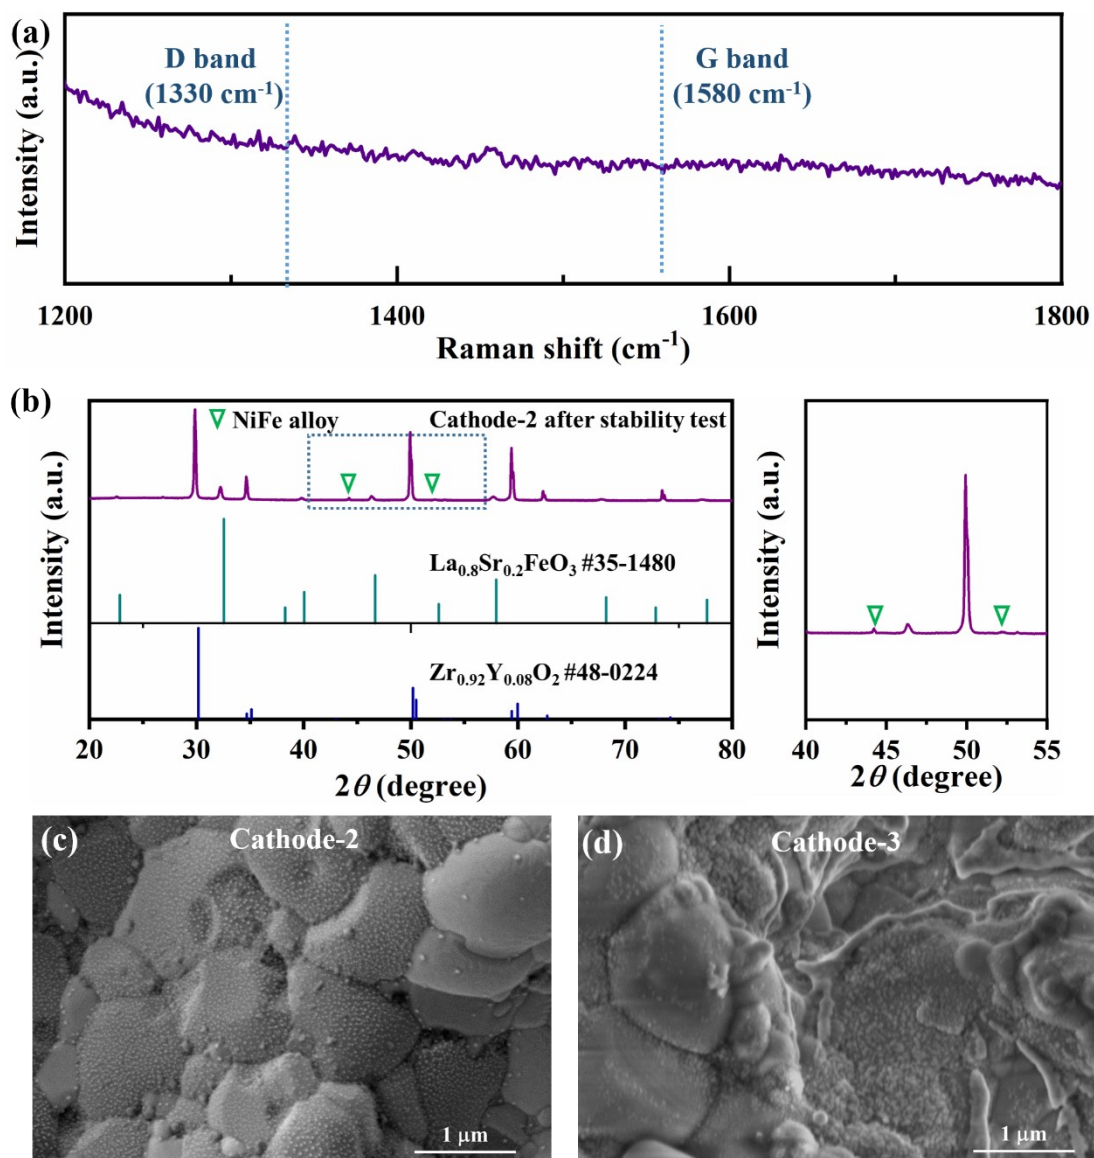

**Fig. S5** (a) Raman spectra collected from the surface of Cathode-2 after stability test; (b) XRD patterns of Cathode-2 after test; Sectional SEM images of (c) Cathode-2 and (d) Cathode-3 after stability test.

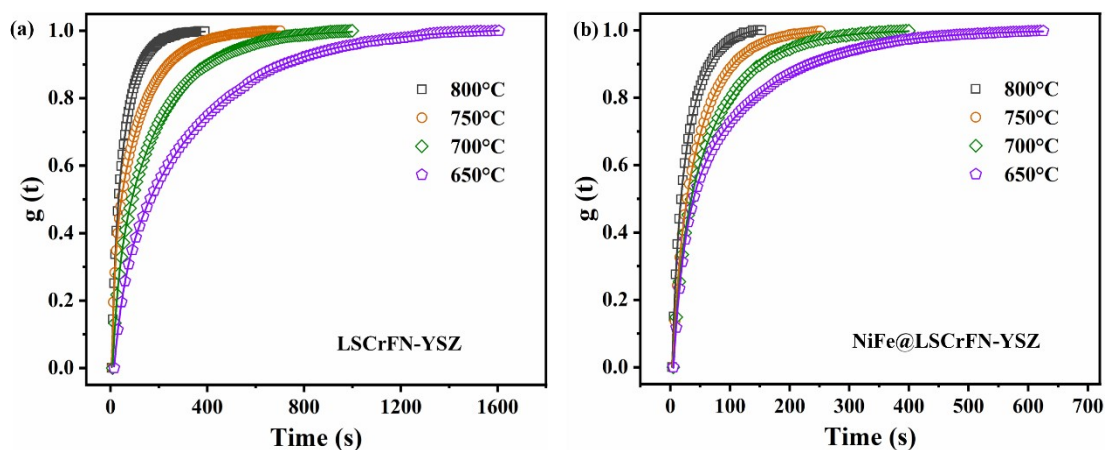

**Fig. S6** Electrical conductivity relaxation curves of (a) LSCrFN-YSZ and (b) NiFe@LSCrFN-YSZ at 650-800°C

**Table S1** XPS analysis of Ni 3*p* for the LSCrFN and NiFe@LSCrFN.

| sample      | Ni <sup>0</sup> (at%) | Ni <sup>2+</sup> (at%) |
|-------------|-----------------------|------------------------|
| LSCrFN      | 0                     | 100                    |
| NiFe@LSCrFN | 33.3                  | 72.2                   |

**Table S2** XPS analysis of Fe 2*p* for the LSCrFN and NiFe@LSCrFN.

| sample      | Fe <sup>0</sup> (at%) | Fe <sup>3+</sup> (at%) | Fe <sup>2+</sup> (at%) |
|-------------|-----------------------|------------------------|------------------------|
| LSCrFN      | 0                     | 61.9                   | 38.1                   |
| NiFe@LSCrFN | 6.6                   | 54.9                   | 38.5                   |

**Table S3** XPS analysis of Cr 2*p* for the LSCrFN and NiFe@LSCrFN.

| sample      | Cr <sup>6+</sup> (at%) | Cr <sup>4+</sup> (at%) | Cr <sup>3+</sup> (at%) |
|-------------|------------------------|------------------------|------------------------|
| LSCrFN      | 28.5%                  | 16.7%                  | 54.8%                  |
| NiFe@LSCrFN | 0                      | 24.3%                  | 75.7%                  |

**Table S4** XPS analysis of O 1*s* for the LSCrFN and NiFe@LSCrFN.

| sample      | O <sub>L</sub> (at%) | O <sub>V</sub> (at%) | O <sub>C</sub> (at%) |
|-------------|----------------------|----------------------|----------------------|
| LSCrFN      | 46.3                 | 25.3                 | 28.4                 |
| NiFe@LSCrFN | 41.0                 | 35.3                 | 23.7                 |

**Table S5** Comparison of performance at 800°C and 1.5 V for direct CO<sub>2</sub> electrolysis of Cell-2 with other SOECs.

| Fuel electrode | Exsolved nanoparticles | Electrolyte Thickness (μm) | Current density (A·cm <sup>-2</sup> ) | Polarization resistance (Ω·cm <sup>2</sup> ) | Refs      |
|----------------|------------------------|----------------------------|---------------------------------------|----------------------------------------------|-----------|
| LSCMC-SDC      | Cu                     | YSZ (50)                   | 0.25                                  | 0.50 at 2 V                                  | [1]       |
| LSTMN-YSZ      | Ni                     | YSZ (46)                   | 0.075                                 | 2.20 at 1.6V                                 | [2]       |
| LSTCN1-SDC     | Ni                     | YSZ (28)                   | 0.4                                   | 0.51 at 1.6 V                                | [3]       |
| LSTCN2-SDC     | Ni                     | LSGM (55.5)                | 0.6                                   | 0.43 at 1.6 V                                | [4]       |
| LCFN-GDC       | NiFe                   | YSZ (300)                  | 0.9                                   | 0.40 at 1.3V                                 | [5]       |
| LSCrFN-YSZ     | NiFe                   | YSZ (13)                   | 1.15                                  | 0.27@1.5V                                    | This work |

Notes: LSCMC = (La<sub>0.75</sub>Sr<sub>0.25</sub>)<sub>0.9</sub>(Cr<sub>0.5</sub>Mn<sub>0.5</sub>)<sub>0.9</sub>Cu<sub>0.1</sub>O<sub>3-δ</sub>,

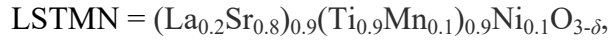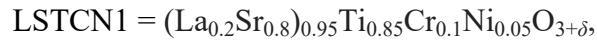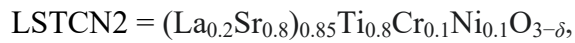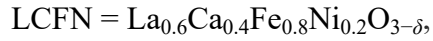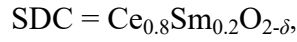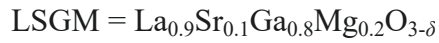

## References

1. H. Li, G. Sun, K. Xie, W. Qi, Q. Qin, H. Wei, S. Chen, Y. Wang, Y. Zhang and Y. Wu, *Int. J. Hydrogen Energy*, 2014, **39**, 20888-20897.
2. Y. Li, K. Xie, S. Chen, H. Li, Y. Zhang and Y. Wu, *Electrochim. Acta*, 2015, **153**, 325-333.
3. L. Ye, M. Zhang, P. Huang, G. Guo, M. Hong, C. Li, J. T. Irvine and K. Xie, *Nat. Commun.*, 2017, **8**, 1-10.
4. L. Bai, H. Li, Z. Yan, X. Hao, M. Ke, K. Xie and B. Li, *Adv. Mater. Interfaces*, 2021, **8**, 2001598.
5. Y. Tian, Y. Liu, A. Naden, L. Jia, M. Xu, W. Cui, B. Chi, J. Pu, J. T. Irvine and J. Li, *J. Mater. Chem. A*, 2020, **8**, 14895-14899.
